# Supplementary material
Source: Springer Nature journal article supplement (https://www.springermedizin.de/resource/supplementary/12936_2014_3673_MOESM2_ESM.pdf/9546172)

Allele Frequencies

TA81

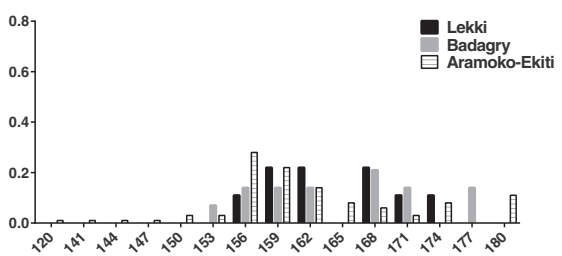

PFK2

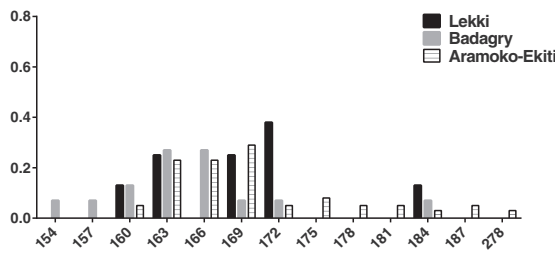

TA40

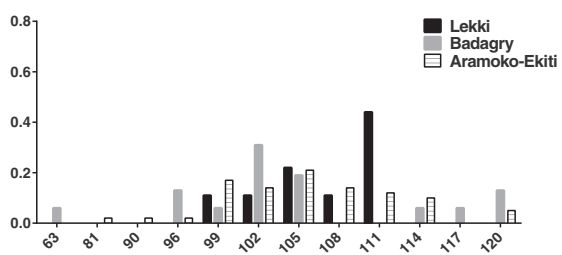

Polya

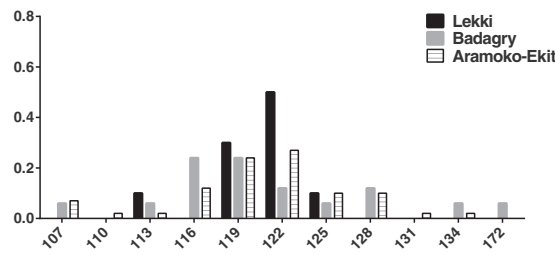

TA42

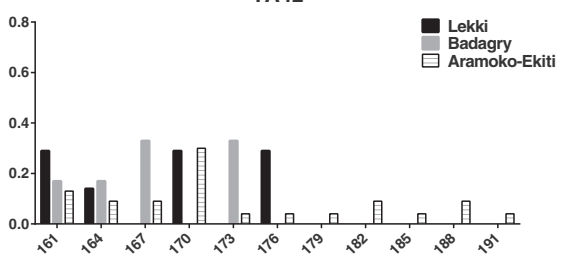

ARA2

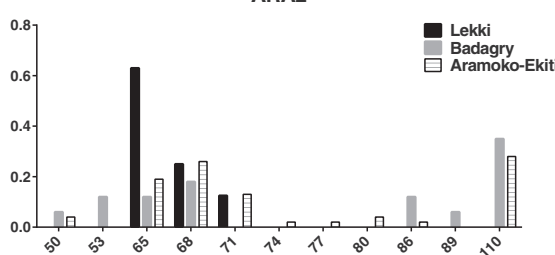

TA109

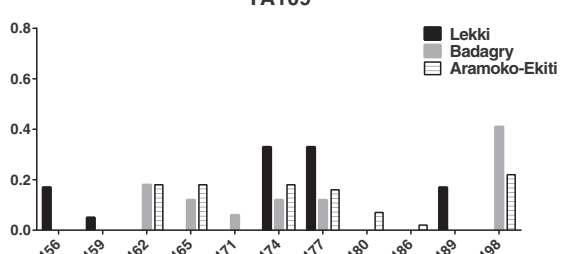

PFG377

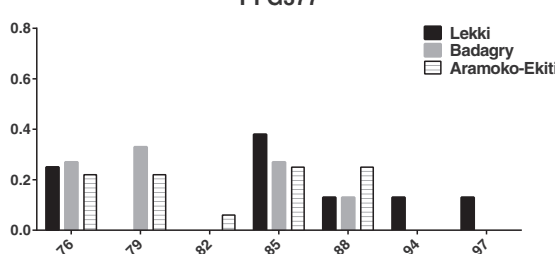

TA60

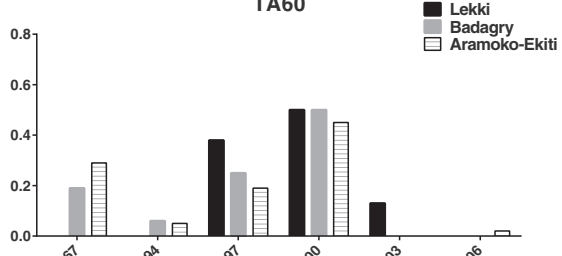

2490

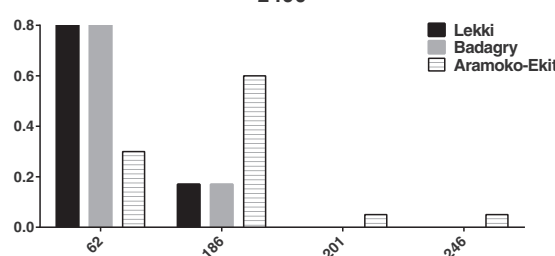

Allele size (bp)

Supplement: MOESM2 [file 9546172]
